# Supplementary material for: An integrative pan-cancer analysis reveals the oncogenic role of mutS homolog 6 (MSH6) in human tumors
Source: publisher site journal article supplement (doi:10.18632/aging.203745), 2021-12-07
Supplement: Supplementary file [file aging-v13i23-203745-supplementary-material-SD2.pdf]

## SUPPLEMENTARY TABLE

**Supplementary Table 1. Summary of TCGA cancer types.**

| <b>TCGA cancer abbreviation</b> | <b>TCGA cancer type</b>                                          |
|---------------------------------|------------------------------------------------------------------|
| ACC                             | Adrenocortical carcinoma                                         |
| BLCA                            | Bladder Urothelial Carcinoma                                     |
| BRCA                            | Breast invasive carcinoma                                        |
| CESC                            | Cervical squamous cell carcinoma and endocervical adenocarcinoma |
| CHOL                            | Cholangiocarcinoma                                               |
| COAD                            | Colon adenocarcinoma                                             |
| DLBC                            | Lymphoid Neoplasm Diffuse Large B-cell Lymphoma                  |
| ESCA                            | Esophageal carcinoma                                             |
| GBM                             | Glioblastoma multiforme                                          |
| HNSC                            | Head and Neck squamous cell carcinoma                            |
| KICH                            | Kidney Chromophobe                                               |
| KIRC                            | Kidney renal clear cell carcinoma                                |
| KIRP                            | Kidney renal papillary cell carcinoma                            |
| LAML                            | Acute Myeloid Leukemia                                           |
| LGG                             | Brain Lower Grade Glioma                                         |
| LIHC                            | Liver hepatocellular carcinoma                                   |
| LUAD                            | Lung adenocarcinoma                                              |
| LUSC                            | Lung squamous cell carcinoma                                     |
| MESO                            | Mesothelioma                                                     |
| OV                              | Ovarian serous cystadenocarcinoma                                |
| PAAD                            | Pancreatic adenocarcinoma                                        |
| PCPG                            | Pheochromocytoma and Paraganglioma                               |
| PRAD                            | Prostate adenocarcinoma                                          |
| READ                            | Rectum adenocarcinoma                                            |
| SARC                            | Sarcoma                                                          |
| SKCM                            | Skin Cutaneous Melanoma                                          |
| STAD                            | Stomach adenocarcinoma                                           |
| TGCT                            | Testicular Germ Cell Tumors                                      |
| THYM                            | Thymoma                                                          |
| THCA                            | Thyroid carcinoma                                                |
| UCS                             | Uterine Carcinosarcoma                                           |
| UCEC                            | Uterine Corpus Endometrial Carcinoma                             |
| UVM                             | Uveal Melanoma                                                   |
